# Supplementary material for: Open access policies of leading medical journals: a cross-sectional study
Source: bioRxiv or medRxiv preprint supplement (doi:10.1101/250613), 2018-12-17
Supplement: Supplementary file [file 250613-1.pdf]

## Supplemental information

**Table S1.** Definitions of CC licences commonly used by medical journals.<sup>6</sup>

| Type               | Definition                                                                                                                                                                                 |
|--------------------|--------------------------------------------------------------------------------------------------------------------------------------------------------------------------------------------|
| <b>CC BY</b>       | Free to distribute and adapt the original work, even commercially, if the original creation and authors are credited                                                                       |
| <b>CC BY-NC</b>    | Free to adapt the original work non-commercially and, although derivative works must also acknowledge the authors and be non-commercial, they do not have to be licensed on the same terms |
| <b>CC BY-NC-ND</b> | Free to download the original work and share it if the authors are credited, but the work cannot be adapted or used commercially                                                           |

CC, Creative Commons; CC BY, Creative Commons Attribution; NC, Non-Commercial; ND, No Derivatives.
